# Supplementary material for: The human genome contains over a million autonomous exons
Source: Genome Res. 2023 Nov;33(11):1865–78. doi: 10.1101/gr.277792.123 (PMC10760453; doi:10.1101/gr.277792.123)
Supplement: Supplement 3 [file Supplemental_details.xlsx]

## Sheet: Outline
Oligos
Vectors
Library Barcodes
Products
Databases

## Sheet: Oligos
Synthesized
Oligonucleotide: NS601	This work	TCGTCGGCAGCGTCAGATGTGTATAAGAGACAGCCCTCTTTAGAGCTCCAG
Oligonucleotide: NS602	This work	GTCTCGTGGGCTCGGAGATGTGTATAAGAGACAGNNNNNNNNTGGGAGCAAGCAGTT
Oligonucleotide: NS603	This work	TCGTCGGCAGCGTCAGATGTGTATAAGAGACAGCAGCCGGATGCAG
Oligonucleotide: NS604	This work	GTCTCGTGGGCTCGGAGATGTGTATAAGAGACAGNNNNNNNNGCAAAAGGGCGTCT
Oligonucleotide: NS605	This work	TCGTCGGCAGCGTCAGATGTGTATAAGAGACAGCCTCTGGAATGGTTCAG
Oligonucleotide: NS606	This work	GTCTCGTGGGCTCGGAGATGTGTATAAGAGACAGNNNNNNNNAGTCGTGACGTGAGT
Oligonucleotide: Illumina P5	Illumina Adapter Sequences (document)	AATGATACGGCGACCACCGA
Oligonucleotide: Illumina P7	Illumina Adapter Sequences (document)	CAAGCAGAAGACGGCATACGAGAT
Oligonucleotide: pTH_T5_RT_3	IDT	ACAGATCGTTGGTATAGAACC
Oligonucleotide: age_25	This work	/5Phos/ CTGTTCATACGTGATTTATCTTATTTGCTTTTATAAGCCA
Oligonucleotide: age_common	This work	ATCACGTATGAACAGT
Oligonucleotide: not_25	This work	/5Phos/ GTCATCATGATACCTGCCTCGACTTCATAAGCCATTTTGG
Oligonucleotide: not_common	This work	AGGTATCATGATGACT
Commercial
UDP0313	IDT® for Illumina Nextera DNA Unique Dual Indexes Set D	Sample barcode 1
UDP0314	IDT® for Illumina Nextera DNA Unique Dual Indexes Set D	Sample barcode 2
UDP0315	IDT® for Illumina Nextera DNA Unique Dual Indexes Set D	Sample barcode 3
UDP0316	IDT® for Illumina Nextera DNA Unique Dual Indexes Set D	Sample barcode 4
UDP0317	IDT® for Illumina Nextera DNA Unique Dual Indexes Set D	Sample barcode 5
UDP0320	IDT® for Illumina Nextera DNA Unique Dual Indexes Set D	Sample barcode 6
UDP0321	IDT® for Illumina Nextera DNA Unique Dual Indexes Set D	Sample barcode 7
UDP0323	IDT® for Illumina Nextera DNA Unique Dual Indexes Set D	Sample barcode 8
UDP0340	IDT® for Illumina Nextera DNA Unique Dual Indexes Set D	Sample barcode 9
UDP0325	IDT® for Illumina Nextera DNA Unique Dual Indexes Set D	Sample barcode 10
UDP0327	IDT® for Illumina Nextera DNA Unique Dual Indexes Set D	Sample barcode 11
UDP0328	IDT® for Illumina Nextera DNA Unique Dual Indexes Set D	Sample barcode 12
UDP0329	IDT® for Illumina Nextera DNA Unique Dual Indexes Set D	Sample barcode 13
UDP0330	IDT® for Illumina Nextera DNA Unique Dual Indexes Set D	Sample barcode 14
UDP0331	IDT® for Illumina Nextera DNA Unique Dual Indexes Set D	Sample barcode 15
UDP0332	IDT® for Illumina Nextera DNA Unique Dual Indexes Set D	Sample barcode 16
UDP0333	IDT® for Illumina Nextera DNA Unique Dual Indexes Set D	Sample barcode 17
UDP0342	IDT® for Illumina Nextera DNA Unique Dual Indexes Set D	Sample barcode 18
UDP0335	IDT® for Illumina Nextera DNA Unique Dual Indexes Set D	Sample barcode 19
UDP0336	IDT® for Illumina Nextera DNA Unique Dual Indexes Set D	Sample barcode 20
UDP0337	IDT® for Illumina Nextera DNA Unique Dual Indexes Set D	Sample barcode 21
UDP0338	IDT® for Illumina Nextera DNA Unique Dual Indexes Set D	Sample barcode 22
UDP0341	IDT® for Illumina Nextera DNA Unique Dual Indexes Set D	Sample barcode 23

## Sheet: Vectors
plasmid #	strain	notes	.	sequence
2	pTH15480	vector 2	.	GACGGATCGGGAGATCTCCCGATCCCCTATGGTGCACTCTCAGTACAATCTGCTCTGATGCCGCATAGTTAAGCCAGTATCTGCTCCCTGCTTGTGTGTTGGAGGTCGCTGAGTAGTGCGCGAGCAAAATTTAAGCTACAACAAGGCAAGGCTTGACCGACAATTGCATGAAGAATCTGCTTAGGGTTAGGCGTTTTGCGCTGCTTCGCGATGTACGGGCCAGATATACGCGTTGACATTGATTATTGACTAGTTATTAATAGTAATCAATTACGGGGTCATTAGTTCATAGCCCATATATGGAGTTCCGCGTTACATAACTTACGGTAAATGGCCCGCCTGGCTGACCGCCCAACGACCCCCGCCCATTGACGTCAATAATGACGTATGTTCCCATAG…
3	pTH15481	vector 3	.	GACGGATCGGGAGATCTCCCGATCCCCTATGGTGCACTCTCAGTACAATCTGCTCTGATGCCGCATAGTTAAGCCAGTATCTGCTCCCTGCTTGTGTGTTGGAGGTCGCTGAGTAGTGCGCGAGCAAAATTTAAGCTACAACAAGGCAAGGCTTGACCGACAATTGCATGAAGAATCTGCTTAGGGTTAGGCGTTTTGCGCTGCTTCGCGATGTACGGGCCAGATATACGCGTTGACATTGATTATTGACTAGTTATTAATAGTAATCAATTACGGGGTCATTAGTTCATAGCCCATATATGGAGTTCCGCGTTACATAACTTACGGTAAATGGCCCGCCTGGCTGACCGCCCAACGACCCCCGCCCATTGACGTCAATAATGACGTATGTTCCCATAG…
1	pTH15482	vector 1	.	GACGGATCGGGAGATCTCCCGATCCCCTATGGTGCACTCTCAGTACAATCTGCTCTGATGCCGCATAGTTAAGCCAGTATCTGCTCCCTGCTTGTGTGTTGGAGGTCGCTGAGTAGTGCGCGAGCAAAATTTAAGCTACAACAAGGCAAGGCTTGACCGACAATTGCATGAAGAATCTGCTTAGGGTTAGGCGTTTTGCGCTGCTTCGCGATGTACGGGCCAGATATACGCGTTGACATTGATTATTGACTAGTTATTAATAGTAATCAATTACGGGGTCATTAGTTCATAGCCCATATATGGAGTTCCGCGTTACATAACTTACGGTAAATGGCCCGCCTGGCTGACCGCCCAACGACCCCCGCCCATTGACGTCAATAATGACGTATGTTCCCATAG…
4	pTH15547	vector 1 based, alt 5ss, GTAGT>GTTTTT	.	GACGGATCGGGAGATCTCCCGATCCCCTATGGTGCACTCTCAGTACAATCTGCTCTGATGCCGCATAGTTAAGCCAGTATCTGCTCCCTGCTTGTGTGTTGGAGGTCGCTGAGTAGTGCGCGAGCAAAATTTAAGCTACAACAAGGCAAGGCTTGACCGACAATTGCATGAAGAATCTGCTTAGGGTTAGGCGTTTTGCGCTGCTTCGCGATGTACGGGCCAGATATACGCGTTGACATTGATTATTGACTAGTTATTAATAGTAATCAATTACGGGGTCATTAGTTCATAGCCCATATATGGAGTTCCGCGTTACATAACTTACGGTAAATGGCCCGCCTGGCTGACCGCCCAACGACCCCCGCCCATTGACGTCAATAATGACGTATGTTCCCATAG…
5	pTH15529	vector 1 based, scramble RBFOX site, hairpin loop CATG>ACGT	.	GACGGATCGGGAGATCTCCCGATCCCCTATGGTGCACTCTCAGTACAATCTGCTCTGATGCCGCATAGTTAAGCCAGTATCTGCTCCCTGCTTGTGTGTTGGAGGTCGCTGAGTAGTGCGCGAGCAAAATTTAAGCTACAACAAGGCAAGGCTTGACCGACAATTGCATGAAGAATCTGCTTAGGGTTAGGCGTTTTGCGCTGCTTCGCGATGTACGGGCCAGATATACGCGTTGACATTGATTATTGACTAGTTATTAATAGTAATCAATTACGGGGTCATTAGTTCATAGCCCATATATGGAGTTCCGCGTTACATAACTTACGGTAAATGGCCCGCCTGGCTGACCGCCCAACGACCCCCGCCCATTGACGTCAATAATGACGTATGTTCCCATAG…
Note: See word document for plasmid highlighting

## Sheet: Library_barcodes
Sample number	Illumina name	i7 sample	i5 novaseq	plasmid #	replicate #	#bases R1 dark cycled
1	UDP0313	TTAATAGCAC	CAGACGTGGT	1	1	4
2	UDP0314	CATTCACGCT	TGAGTACAAC	1	2	4
3	UDP0315	GGCACTAAGG	GTTGACCTGA	1	3	4
4	UDP0316	ATTCGGTACA	TCCTCGGACT	1	4	4
5	UDP0317	ACTAATCTCC	AGATTAAGTG	1	5	4
6	UDP0320	CGGTCGGCAT	CCTTGCCTAG	2	1	3
7	UDP0321	TCGACGCTAG	TTCGAAGAGG	2	2	3
8	UDP0323	AAGTTCTAGT	TTATCTTACC	3	1	3
9	UDP0340	GCAACCAGTC	TTCCTCGGTG	3	2	3
10	UDP0325	ATATCTGCTT	AGATTGTCTA	3	3	3
11	UDP0327	TTGAATCCAA	ACACCGTGAC	3	4	3
12	UDP0328	CACGGCTAGT	CTTGTACACC	4	1	3
13	UDP0329	GAGCTTGCCG	CCTGCAACCT	4	2	3
14	UDP0330	AGCTAGCTTC	CTCCGTATTA	4	3	3
15	UDP0331	CAATCCTTGT	TGCGTCTTCG	4	4	3
16	UDP0332	CACCTGTTGC	ATGTGTCAAT	5	1	3
17	UDP0333	CGTCACCTTG	CAATCGGCTG	5	2	3
18	UDP0342	CGAACGCACC	GTTCTGTCAT	5	3	3
19	UDP0335	ATGATTCCGG	CACGTCAGAG	5	4	3
20	UDP0336	TTAGGCTCAA	TTCCATTCGA	5	5	3
21	UDP0337	TGTAAGGTGG	CCAAGGCCTT	2	3	3
22	UDP0338	CAACTGCAAC	GTTGCGTTCA	2	4	3
23	UDP0341	GAGCGACGAT	TGATTATACG	3	5	3

## Sheet: Products
REAGENT or RESOURCE	SOURCE	IDENTIFIER
dsDNA Fragmentase	NEB	M0348
DNA Elution buffer	NEB	T1016L
NEB Quick Ligase	NEB	M2200L
NEBNext® dsDNA Fragmentase	NEB	M0348
10 mM dNTPs	NEB	N0447L
Cutsmart buffer	NEB	B9000S
NEBNext® dA-Tailing Module	NEB	E6053L
NEBNext® End Repair Module	NEB	E6050L
AgeI-HF	NEB	R3552L
NotI-HF	NEB	R3189L
Q5® High-Fidelity DNA Polymerase	NEB	M0491L
NEBuilder® HiFi DNA Assembly Master Mix	NEB	E2621L
0.5M EDTA	Invitrogen	AM9260G
UltraPure™ Phenol:Chloroform:Isoamyl Alcohol (25:24:1, v/v)	Invitrogen	15593031
Superscript IV	Invitrogen	18090010
GlycoBlue™ Coprecipitant	Invitrogen	AM9515
SYBR Safe	Invitrogen	S33102
EvaGreen® Dye	Biotium	31000
SYBR Gold	Invitrogen	S11494
DMEM	Gibco	11995065
Penicillin-Streptomycin	Gibco	15140122
FBS	Life tech	A3160702
Opti-Mem	Thermofisher	31985062
Viafect	Promega	E4982
Trizol	Invitrogen	15596018
BCP	MRC	BP 151
Chloroform	BioShop	CCL402.1
TWEEN 20	Sigma-Aldrich	P1379
AMPure XP beads	Beckman Coulter	A63880
Quick-Load® Purple 100 bp DNA Ladder	NEB	N0551L
Gel Loading Dye, Purple	NEB	B7025S
Carbenicillin, Disodium salt	BioShop	CAR666.5
Poly(A)Purist™ MAG Kit	Invitrogen	AM1922
PureLink™ Genomic DNA Mini Kit	Invitrogen	K182002
ElectroMAX Stbl4 competent cells	Invitrogen	11635018
PureLink Genomic DNA Mini Kit	Invitrogen	K182002
QIAEX II Gel Extraction Kit	Qiagen	20021
Qiagen HiSpeed Midiprep kit	Qiagen	12643
5% Mini-PROTEAN® TBE Gel	BioRad	4565014
Clean and Concentrator 5	Zymo	D4004
Qubit™ dsDNA BR Assay Kits	Invitrogen	Q32850
MaXtract High Density phase separation tubes (15 ml)	Qiagen	129065
IDT® for Illumina Nextera DNA Unique Dual Indexes Set D	Illumina	20027216

## Sheet: Databases
Public database		Weblink
lncipedia		https://lncipedia.org/downloads/lncipedia_5_2/high-confidence-set/lncipedia_5_2_hc_hg38.bed
RNAcentral		https://ftp.ebi.ac.uk/pub/databases/RNAcentral/releases/9.0/genome_coordinates/Homo_sapiens.GRCh38.bed.gz
NONCODE		http://www.noncode.org/datadownload/NONCODEv6_human.fa.gz
Capture Long-Seq (CLS) via GENCODE+		https://public-docs.crg.es/rguigo/CLS/data/gencodePlus/hs.GENCODE+.lncRNA.bed
Dfam v3.4		https://dfam.org/releases/Dfam_3.4/families/Dfam.embl.gz
hg38_dfam.nrph.hits		https://dfam.org/releases/Dfam_3.4/annotations/hg38/hg38_dfam.nrph.hits.gz
phyloP		https://hgdownload.soe.ucsc.edu/goldenPath/hg38/phyloP17way/hg38.phyloP17way.bw
CHESS		https://github.com/chess-genome/chess/releases/download/v2.2/chess2.2.gff.gz
Gencode v37 comprehensive gff3		https://ftp.ebi.ac.uk/pub/databases/gencode/Gencode_human/release_37/gencode.v37.annotation.gff3.gz
HEXEvent via website downloader		http://hexevent.mmg.uci.edu/HEXEvent/example.html
GEO		GSE213006
HEK293_inclusion		https://ftp.ncbi.nlm.nih.gov/geo/series/GSE221nnn/GSE221838/suppl/GSE221838_d0_v_d1000_SE.MATS.JCEC.txt.gz
HEK293_expression		https://ftp.ncbi.nlm.nih.gov/geo/series/GSE235nnn/GSE235387/suppl/GSE235387_HEK293.xlsx
Paper supplements
housekeeping_gene_list		https://academic.oup.com/nar/article/49/D1/D947/5871367#supplementary-data
ISS_pdf		https://www.ncbi.nlm.nih.gov/pmc/articles/PMC3001057/bin/supp_gkq679_supplement.pdf
		https://oup.silverchair-cdn.com/oup/backfile/Content_public/Journal/nar/49/D1/10.1093_nar_gkaa609/1/gkaa609_supplemental_files.zip
		HISAT2
		SAMTOOLS
		IGV
		fasta-shuffle-letters	MEME Suite (Bailey et al., 2009)	conda install -c edurand meme-suite
